# Supplementary material for: The impact of DNA damage response gene polymorphisms on therapeutic outcomes in late stage ovarian cancer
Source: PubMed Central journal article supplement (PMC5131275; doi:10.1038/srep38142), 2016-12-01
Supplement: srep38142-s1.pdf [file srep38142-s1.pdf]

**The impact of DNA damage response gene polymorphisms on therapeutic outcomes in late stage ovarian cancer.**

Guffanti F<sup>1</sup>, Fruscio R<sup>2</sup>, Rulli E<sup>3\*</sup> and Damia G<sup>1\*</sup>.

<sup>1</sup>Department of Oncology, Laboratory of Molecular Pharmacology, IRCCS-Istituto di RicercheFarmacologiche Mario Negri, Milan, Italy.<sup>2</sup>Clinic of Obstetrics and Gynecology, San Gerardo Hospital, Department of Medicine and Surgery, University of Milan-Bicocca, Italy. <sup>3</sup>Department of Oncology, Laboratory of Methodology for Clinical Research, IRCCS-Istituto di RicercheFarmacologiche Mario Negri, Milan, Italy.

## Legends to Supplementary Figures

**Supplementary Figure 1.** Overall survival and Progression Free Survival curves by ATM genotypes.

**Supplementary Figure 2.** Overall survival and Progression Free Survival curves by ATR genotypes.

**Supplementary Figure 3.** Overall survival and Progression Free Survival curves by CHK1 (upper panels) and CHK2 (lower panels) genotypes.

## Supplementary Table 1. SNPs evaluated.

| <i>Gene</i>  | <i>Chromosome</i> | <i>Most severe consequence</i>         | <i>Ref. SNP ID n°</i> | <i>MFA</i> |
|--------------|-------------------|----------------------------------------|-----------------------|------------|
| <b>ATM</b>   | 11                | T to C transition: intron variant      | rs664677              | 0,35 (C)   |
|              | 11                | G to A transition: 3 prime UTR variant | rs664143              | 0,37 (A)   |
| <b>ATR</b>   | 3                 | C to T transition: missense variant    | rs2229032             | 0,10 (T)   |
|              | 3                 | G to A transition: missense variant    | rs2227928             | 0,40 (A)   |
| <b>CHEK1</b> | 11                | G to A transition: intron variant      | rs521102              | 0,44 (A)   |
| <b>CHEK2</b> | 22                | T to C transition: intron variant      | rs2267130             | 0,31 (C)   |
| <b>CDK12</b> | 17                | G to A transition: 3 prime UTR variant | rs1054488             | 0,22 (A)   |

MFA= minor allele frequency

**ATM rs664677**

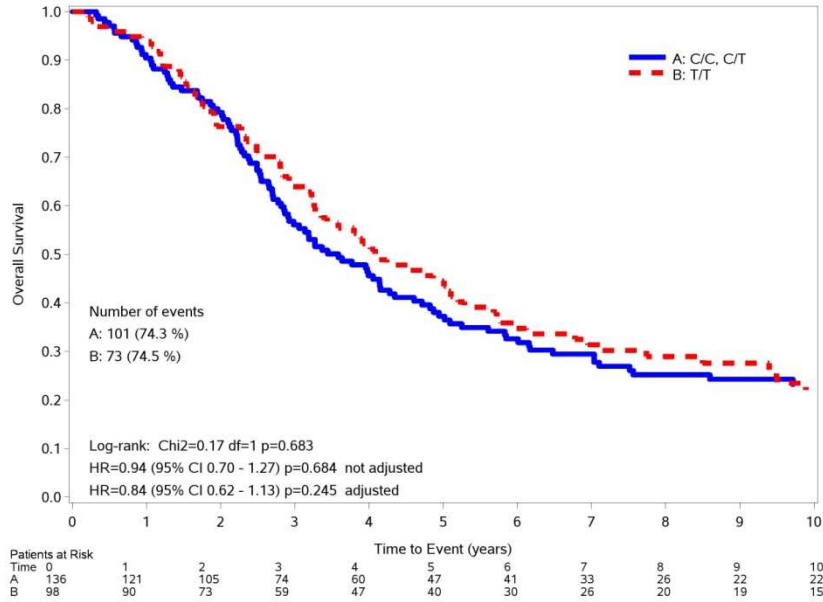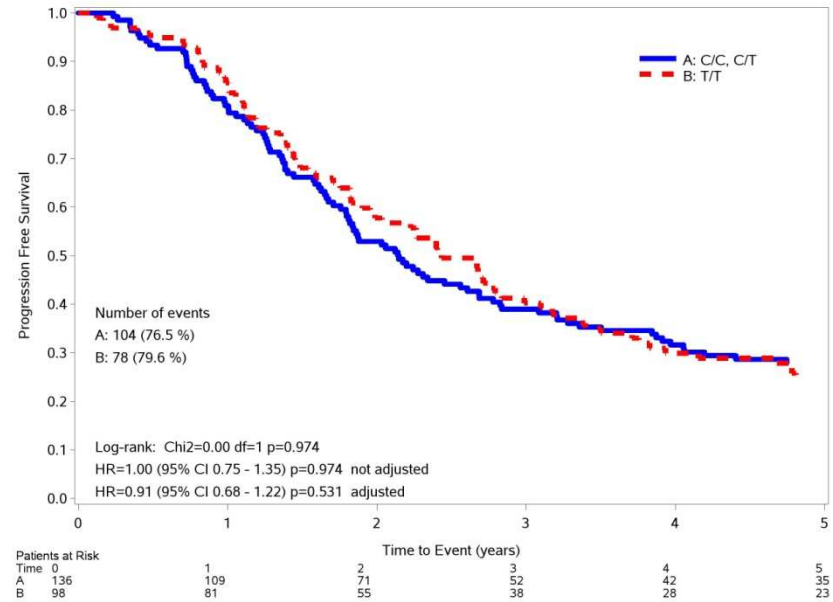

**ATM rs664143**

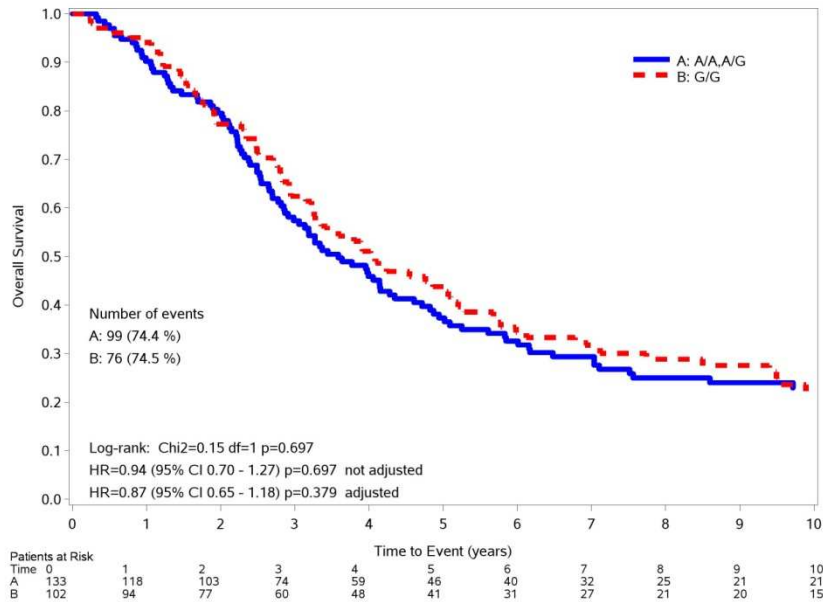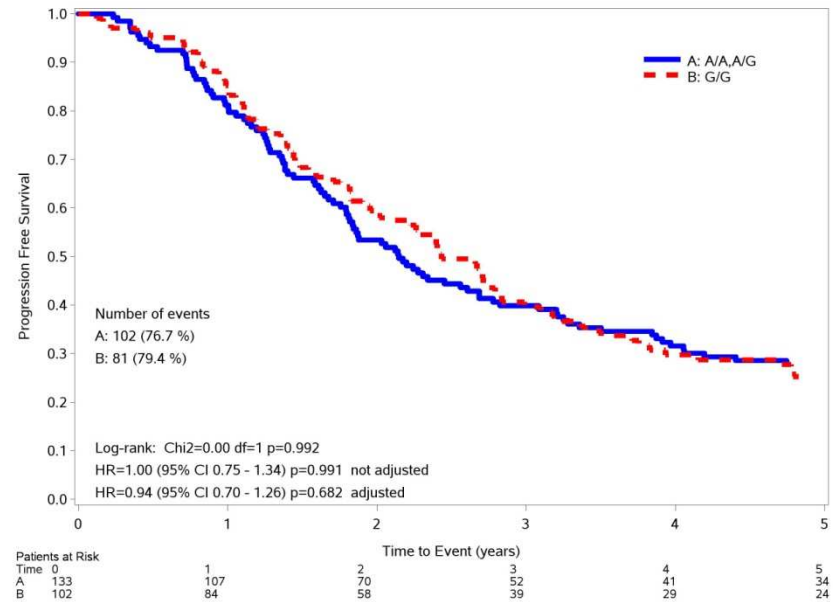

**ATR rs2229032**

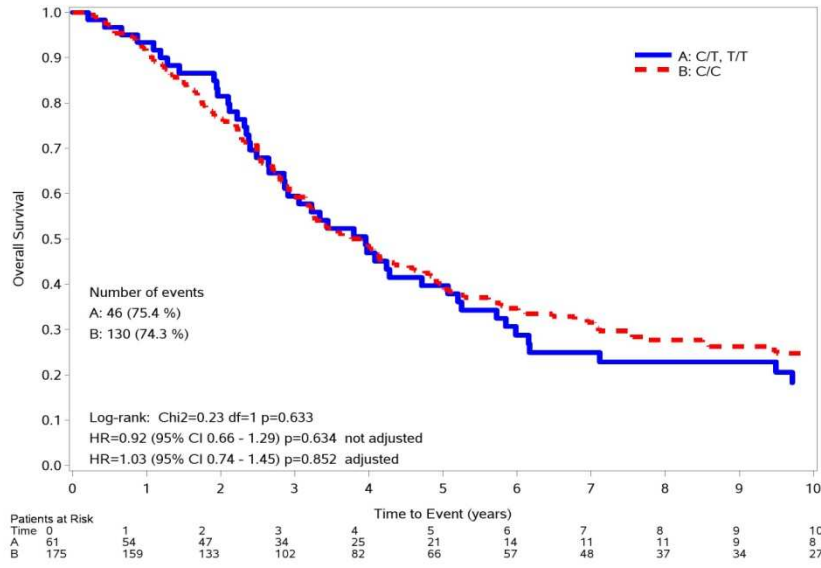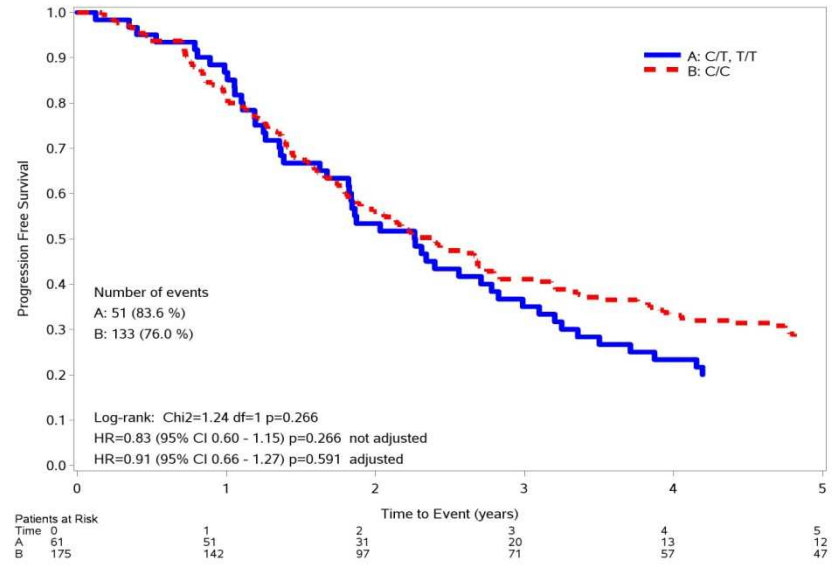

**ATR rs2227928**

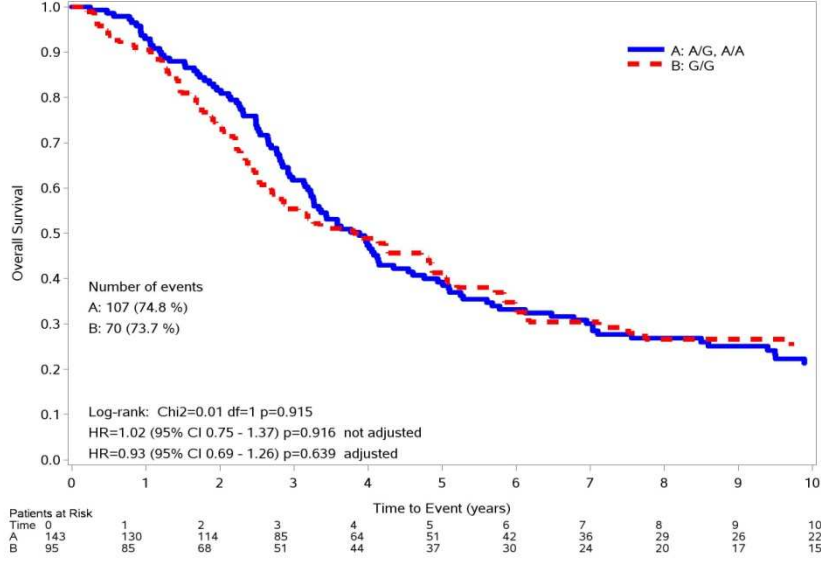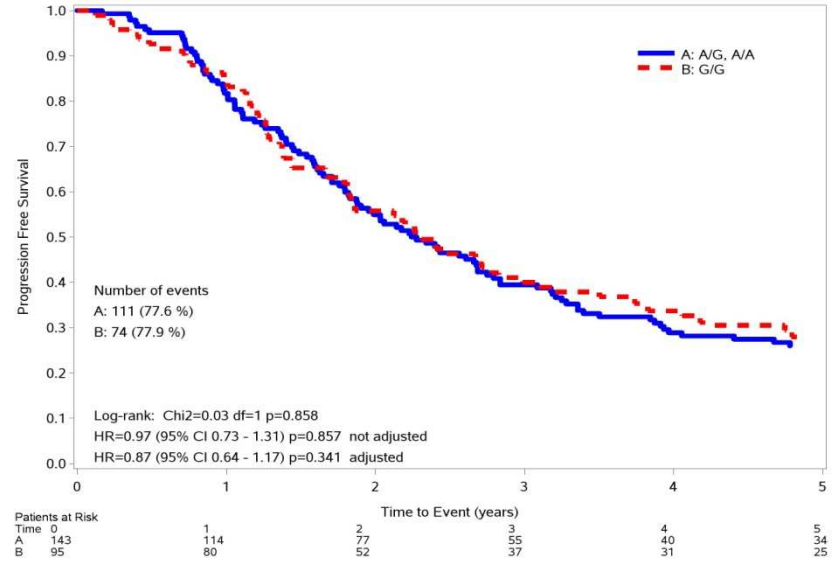

Supplementary Figure 2

**CHEK1 rs521102**

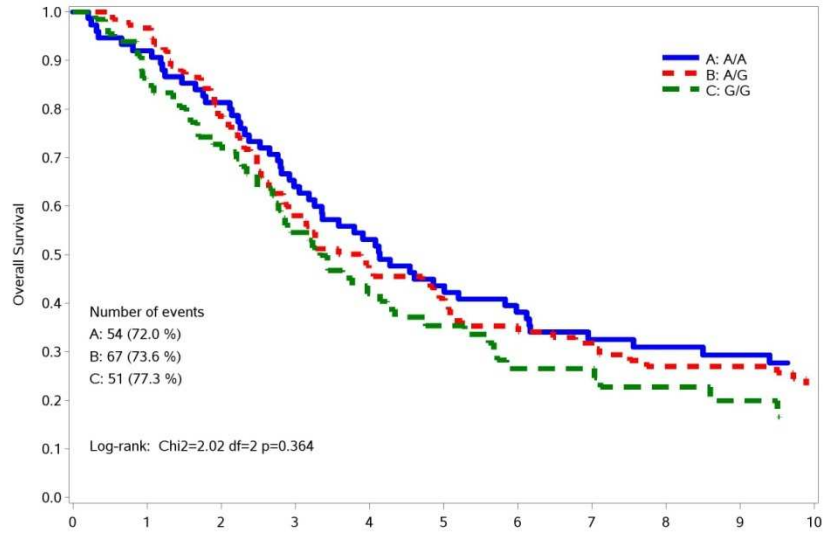

| Patients at Risk | Time to Event (years) |    |    |    |    |    |    |    |    |    |    |
|------------------|-----------------------|----|----|----|----|----|----|----|----|----|----|
| Time             | 0                     | 1  | 2  | 3  | 4  | 5  | 6  | 7  | 8  | 9  | 10 |
| A                | 75                    | 68 | 60 | 47 | 38 | 31 | 27 | 20 | 18 | 17 | 14 |
| B                | 91                    | 85 | 68 | 50 | 40 | 35 | 29 | 26 | 22 | 20 | 18 |
| C                | 66                    | 55 | 47 | 34 | 25 | 19 | 15 | 13 | 7  | 5  | 5  |

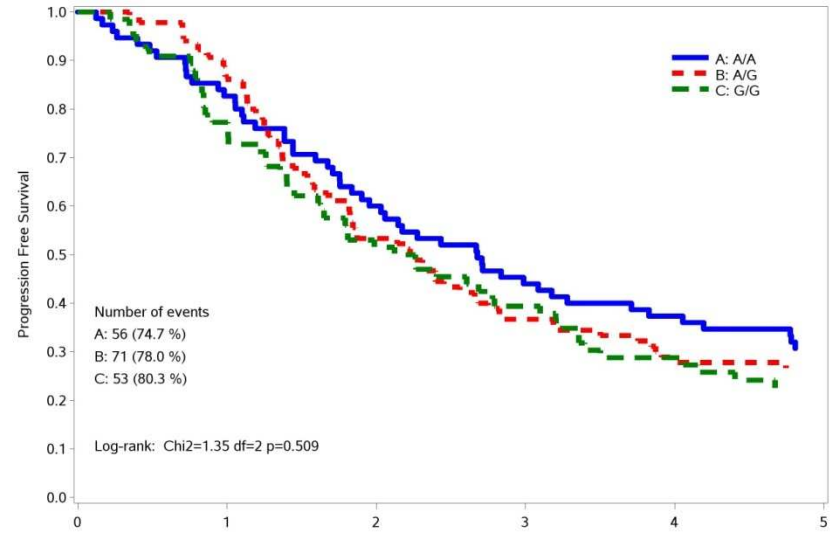

| Patients at Risk | Time to Event (years) |    |    |    |    |    |
|------------------|-----------------------|----|----|----|----|----|
| Time             | 0                     | 1  | 2  | 3  | 4  | 5  |
| A                | 75                    | 61 | 44 | 32 | 27 | 22 |
| B                | 91                    | 77 | 47 | 32 | 24 | 23 |
| C                | 66                    | 50 | 33 | 25 | 18 | 12 |

**CHEK2 rs2267130**

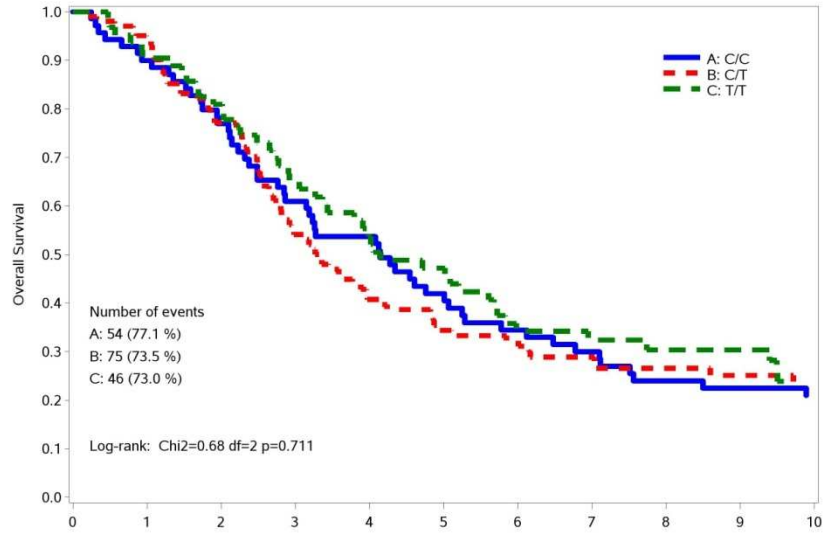

| Patients at Risk | Time to Event (years) |    |    |    |    |    |    |    |    |    |    |
|------------------|-----------------------|----|----|----|----|----|----|----|----|----|----|
| Time             | 0                     | 1  | 2  | 3  | 4  | 5  | 6  | 7  | 8  | 9  | 10 |
| A                | 70                    | 61 | 52 | 41 | 36 | 27 | 22 | 19 | 15 | 14 | 14 |
| B                | 102                   | 94 | 76 | 52 | 38 | 31 | 28 | 23 | 17 | 14 | 12 |
| C                | 63                    | 56 | 50 | 40 | 32 | 28 | 18 | 15 | 15 | 13 | 11 |

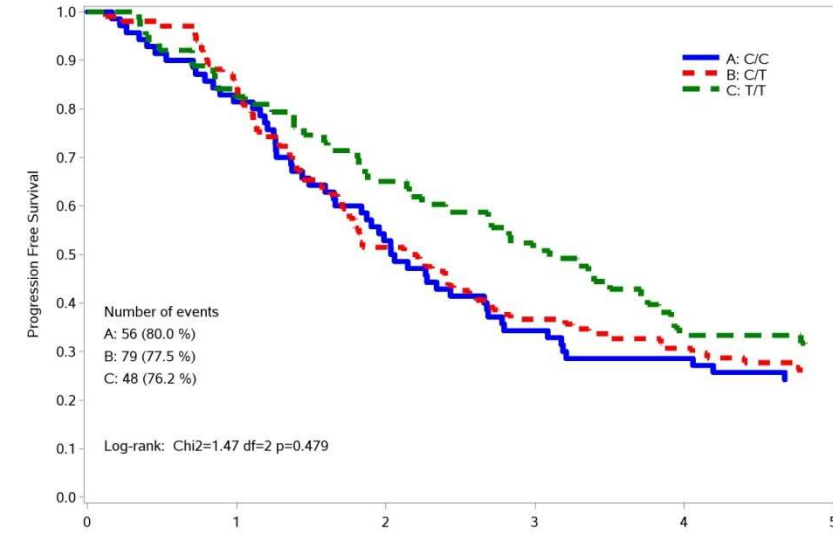

| Patients at Risk | Time to Event (years) |    |    |    |    |    |
|------------------|-----------------------|----|----|----|----|----|
| Time             | 0                     | 1  | 2  | 3  | 4  | 5  |
| A                | 70                    | 56 | 36 | 23 | 19 | 16 |
| B                | 102                   | 85 | 51 | 36 | 30 | 24 |
| C                | 63                    | 51 | 40 | 31 | 20 | 18 |

Supplementary Figure 3
